# Supplementary material for: Reflecting Regional Conditions in Circular Bioeconomy Scenarios: A Multi-Criteria Approach for Matching Technologies and Regions
Source: MDPI journal article supplement (doi:10.3390/su16072935), 2024-04-01
Supplement: s1 [file s1]

Archive with 4 entries (4 files):
- SM_FileS1.pdf
- SM_FileS2_LiteratureReview.xlsx
- SM_FileS3_LiteratureReview_AdaptedAfterExpertSurvey.xlsx
- SM_FileS4_Questionnaire_ExpertSurvey.pdf
