# Supplementary material for: Reflecting Regional Conditions in Circular Bioeconomy Scenarios: A Multi-Criteria Approach for Matching Technologies and Regions
Source: MDPI journal article supplement (doi:10.3390/su16072935), 2024-04-01
Supplement: s1 [file s1 › SM_FileS2_LiteratureReview.xlsx]

## Sheet: CriteriaList_LiteratureReview
			1		2		3		4		5		6		7		8		9		10		11		12		15		14		20		16		17		18		19		13		21
	CRITERIA CATEGORY main criteria (no. of studies mentioning criterion) - sub-criteria (no. of studies mentioning criterion)		(Khan et al. 2022)		Salvador (2022)		Marone (2021)		Ding (2021)		Qin (2021)		Ossei-Bremag (2021)		Falcone (2020)		Paes (2019)		Salvador (2022a)		Karuppiah (2022)		Yadac (2022)		Gottinger (2020)		Donner (2023)		Näyhä (2020)		Donner (2021)		Lange (2021)		Rao (2023)		Kardung (2021)		Kapoor (2020)		Donner (2020)		Usmani (2021)		Fytili (2022)
	BIOMASS RESOURCE		BIOMASS RESOURCE								BIOMASS RESOURCE								BIOMASS RESOURCE								BIOMASS RESOURCE								BIOMASS RESOURCE								BIOMASS RESOURCE
	biomass availability (20) - temporal fluctuation in biomass availability (7) - competing biomass uses | security of biomass supply in long term (7) - sustainably available biomass (5) - distribution of biomass availability (point vs. non-point sources) (1) - local biomass availability (1)	20 7 7 5 1 1	- biomass availability and seasonality	external	- limited access/availability of biomass - competitiveness between bio-based products and food production might compromise the availability and cost of food;	barrier, environmental	- quantity of the available organic waste supply	sector structure variable	- natural resource availability (availability of sustainable biomass)	conditions & driving forces for transition to a BE	- availability of raw materials; apple orchard waste can be generated and collected only during the apple production season -> multi-materials biorefinery system is necessary for long-term	challenges	- biomass availability	economic selection criteria for biomass resource selection	- great availability of potential wood resources	strenght: characterization of italian wood sector and ist transition towards a circular bioeconomy	- availability of sufficient biomass constrained by environmental factors and seasonality	weakness: of CE in the context of organic waste	- seasonality of feedstock (forces a company to have a portfolio of products, or provide storage) - guaranteeing sustainabilty and security of biomass supply in the long term	barriers challenges	- problems of obtaining input material	barriers, technology and material	- inconsistent supply of feedstock	barriers, logistical	- dificulties to obtain input material	transition barriers, technology and material	- waste and by-product collection in the neighborhood - availability of by-products - fluctuation of waste quantities - competition for food surplus resources	enablers, organizational and spatial enablers, technical & logistic barriers, technical and logistic	- wealth of forest resources - wood-based raw material: availability, sustainability, origin and communication about it, competetive pricing and efficiency	transforming factors: macro-environment transforming factors: tangible organizational resources and capabilities			- biomas supply: limiting feedstock availability, specific feedstock, for wich processing technology have been developed, may not be availale - the feedstock of interest may have found other uses	drivers of CBE in EU	- food surplus valorization: (im)proper distribution of resources, competition for surplus, co-related problems	aspects of food waste valorization: lethics of food surplus valorization	- biomass resource availability - competition of biomass for food and non-food use	driving forces relations within BE ->resource availability	- competition with more established agri-waste to energy technologies	barriers -> technical			- mass processing of biomass waste is not possible due to difference in treatment and operational parameters depending on biomass source and type - sustainable supply of biomass for biorefineries is threatened by logistical challenges and biomass availability throughout the year	weakness threat	- the small size of farms limits the amount of biomass wich a single farmer can provide to the market	barrier, structural
	biomass quality (6) - no standardization of inputs (1) - changes in composition and qualities (1) - toxicant sensitivity (1)	6 1 1 1					- quality of the available organic waste supply	sector structure variable											- maintaining a uniform product (as waste or by-product from other products it is difficult to ensure a continuous flow or the same mix and quality) - Product portfolio of biorefineries might vary over time - lack of standardization of inputs	challenges challenges challenges			- waste characteristics variation - toxicant sensitivity	barriers, technical			- quality of by-products	enablers, technical and logistic	- wood-based raw material: quality	transforming factors: tangible organizational resources and capabilities							- type and quality of available biomass	driving forces relations within BE ->resource availability
	TECHNOLOGICAL		TECHNOLOGICAL								TECHNOLOGICAL								TECHNOLOGICAL								TECHNOLOGICAL								TECHNOLOGICAL								TECHNOLOGICAL
	logistic & supply chain (17) - storage and transportation (5) - space for/ position of facility (4) - waste collection systems (3) - waste separation (1) - high demands: electricity, water… (1)	17 5 4 3 1 1			- underdevelopment of logistical aspects - high complexity and costs of selection and supply of raw materials, and transport	barrier, technological barrier, economic & technological	- improvements to differentiated waste collection systems to increase biomass availability - linear logic and technology-based solutions ignoring the complex characteristics of waste planning activities	political driver sector structure variable			- logistic system	challenges	- storage and transportation cost	economic selection criteria for biomass resource selection	- construction of infrastructure to access remote forests	opportunities: characterization of italian wood sector and ist transition towards a circular bioeconomy	- logistic cost and complexity of supply chain management - helps holistically in the seperation of recyclable waste	weakness: of CE in the context of organic waste opportunity: of CE in the context of organic waste	- transportation/logistics costs and management - limitations on infrastructure and storage capabilities	barriers	- absence of physical infrastructure - problem in logistic and transport (limited involvement of stakeholders leads to a problem in supply chain network)	barriers, technology and material barriers, knowledge and network formation	- inadequate space - high water requirement - lack of slurry management systems	barriers, logistical	- missing physical infrastructure	transition barriers, technology and material	- insufficient space in city difficult to get access to land for composters - well-established logistics - central positioning of the firm - logistics needed for collection	barriers, organization-al and spatial enablers, technical and logistic barriers, technical and logistic	- right location of the facility in regards to resources, collaborators and customers - resources for planning, building and maintaining infrastructure	transforming factors: tangible organizational resources and capabilities					- small-scale, localised operations - supply chain bottlenecks	aspects of food waste valorization: local embeddedness aspects of food waste valorization: coping with uncertainties			- lack of efficient agri-waste supply chain	barriers -> technical	- investments in agro-logistic network	driving forces -> external trends and drivers at business ecosystem level -> economic	- lack of insfrastructure support to enable seamless collaboration between various steakeholders in the biorefinery valuestream	weakness	- immature management and collection systems - lack of large manufacturers of biomass collection machinery - the cultivation of permanent crops in semi-mountainous and mountain soils makes difficult the mechanical collection of the residues - complicated logistics - the supply chains of agricultural biomass lack organizational simplicity - lack of intermediate bodies to form and organize the biom…	barrier, technical barrier, structural barrier, market barrier, organizational
	availability of technology (17) - maturity of technology | need for scale up (7) - technology efficiency | conversion rates (5) - successful technology showcases (3) - complexity of technology | ease of adoption (1)	17 7 5 3 1	- technological efficiency - ease of adoption - ease of recycling composite material	internal external	- technical limitations such as low biomass conversion efficiencies during biochemical processes minimize the profitability of industrial operations - underdevelopment of technical aspects - technology uncertainties in the processing of biorefinery operations	barrier, economic & technological barrier, technological	- operational limits of circular design (including too few large scale demonstration projects)				- the economic feasibility of apple orchard waste biorefinery also depends on the extraction methods used and the maximum recovery rate of bio-actives from waste	economic feasibility	- conversion rate - equipment	economic selection criteria for biomass resource selection	- high mechanization of processing and transporting	strenght: characterization of italian wood sector and ist transition towards a circular bioeconomy	- technological immaturity - increases the efficiency of processes and reduces the consumption of natural resources	weakness: of CE in the context of organic waste opportunity: of CE in the context of organic waste	- scaling-up (many BE products are only prototypes, lack sufficient value generation & large-scale commercialization) - lack of adequate technology (overall immature technology)	challenges challenges	- lack of technology for production	barriers, technology and material			- technical barriers related to production and industrial application	transition barriers, technology and material	- lack of technologies process upscaling - limited production capacity	barriers, technical and logistic barriers, technical and logistic	- very challenging phase, particularly for small firms, is the scaling up of production	transforming factors: tangible organizational resources and capabilities					- bridging technological gaps	aspects of food waste valorization: coping with uncertainties			- best technology showcase	barriers -> technical opportunities -> information and awareness	- technological developments for agro-waste conversion	driving forces -> external trends and drivers at business ecosystem level -> technological	- technical maturity of various valorization techniques is still at lab-scale or pilot scale	weakness	- lack of local successful case-studies for imitation - bioenergy plants are unter authorization/design	barrier, legislative strengths & driving forces, intensive agricultural activities
	availability of knowledge/expertise | R&D (11) - locally based scientific institutions (2) - local tradition of knowledge (1) - advances in sciences (e.g. biological and CIT) (1)	11 2 1 1					- lack of expertise to implement local projects	sector structure variable	- intellectual capital for BE development (R&D expense)										- lack of knowledge on valorization pathways lack of knowledge/skills/ competencies	barriers challenges	- insufficient research and development (R&D) and innovation	barriers, technology and material			- problems with research and knowledge development lack of information and knowledge missing skills and competences	transition barriers, knowledge and network formation	- scientific and private company support - time needed for R&D	enablers, technical and logistics barriers, technical and logistic	- long tradition and extensive knowledge of utilizing forest resources	transforming factors: macro-environment							- advances in biological sciences (e.g. genetic editing, CRISPR-based technologies -> development of regulatory measures is important for advances in biological sciences investment efforts in bioeconomy development - advances in information and communication technologies - other technological advances	driving forces relations within BE -> supply drivers -> technology & innovation	- research & development	opportunities -> information and awareness			- higher knowledge capital creation on the reuse of waste streams	opportunity	- lack of capacity, including technolohy transfer, to anticipate transformative technological trends and promote CWBE transition - The newly restructured University in the region of Thessaly offers possibilities for Research and Technological Development (R&TD) capacity for the bio-economy and circular economy transition.	barrier, knowledge and skills strengths and driving forces, knowledge and innovation capacity
	ENVIRONMENTAL		ENVIRONMENTAL								ENVIRONMENTAL								ENVIRONMENTAL								ENVIRONMENTAL								ENVIRONMENTAL								ENVIRONMENTAL
	potential to mitigate/increase environmental issues (14) - climate change (6) - biodiversity | ecosystems (6) - resource efficiency | circularity (6) - land use (change) (3) - soil- and water quality (2) - waste generation (1)	14 6 6 6 3 2 1	- environmental sustainability	internal	- Inadequate handling of bioresources in early stages might increase biodiversity loss, soil erosion, droughts and other land-use-related damage	barrier, environmental	- reduced impact on the environment	sector outcomes			- design of multiple product outputs can achieve the compre-hensive and efficient usage of raw materials	economic feasibility	- environmental criteria: GHG emissions, biodiversity loss, soil degradation, water quality, LUC	environmental selection criteria for biomass resource selection	- development of ecosystem services	opportunities: characterization of italian wood sector and ist transition towards a circular bioeconomy	- environmental improvement and greenhouse gas emission reduction - offers the possibility to turn waste streams into valuable resources and improve the sustainability of agriculture and food production; - increases the efficiency of processes and reduces the consumption of natural resources	strength: of CE in the context of organic waste	- exploring the local economy (exportation might not be attractive greatly due to logistics costs and environmental impacts)	opportunities									- wood-based raw material: availability, sustainability, origin and communication about it, competetive pricing and efficiency - globally accepted and recognized goals (mitigating global warming; other global challenges, such as replacing plastics or other fossil-based products through sustainable materials & products)	transforming factors: tangible organizational resources and capabilities transforming factors: macro-environment			- need for land use change, freeing land for food production, forest and biodiversity habitats (need to reduce the portion of land that is used for animal feed : animal feed based on industr. side-streams, reuse of materials and aquatic sector can reduce burden on land) - need for climate change mitigation and achievement of the UN SDGs	drivers of CBE in EU			- increase in importance of climate change and pressure on ecosystems	driving forces relations within BE -> supply drivers			efficient usage of a resource	driving forces -> internal drivers for innovation at business level	- clean, green, and sustainable development of products and energy - supports the circular economy principles of maximizing resource utilization and leaving very minimal waste - reduces dependence on fossil fuels thereby reducing climate impact - immense potential to bring down GHG emisisons - reduction in overall waste gene-ration supporting the SDG of the UN - innovative application of waste to…	strength opportunity	- increase of pesticides - increase use of chemical fertilizers	barrier, climate change hazards and bioenergy vulnerabilities
	sensitivity towards environmental changes/ issues (3) - climate change (3) - soil conditions (2) - water scarcity (1)	3 3 2 1													- negative effects of climate change	threat: characterization of italian wood sector and ist transition towards a circular bioeconomy																									- agro-waste and by-products' sensitivity towards climate change and soil conditions	driving forces -> external trends and drivers at business ecosystem level -> environmental			- changes in temp and rainfall, as well as extreme weather and climatic events, are already affecting crop yields and livestock productivity in Greece - water scarcity - desertification	barrier, climate change hazards and bioenergy vulnerabilities
	ECONOMIC		ECONOMIC								ECONOMIC								ECONOMIC								ECONOMIC								ECONOMIC								ECONOMIC
	profitability & markets (18) - competitiveness (with fossil counterparts) (7) - fluctuations in fossil fuel's prices (1) - cost-effectiveness (6) - market demand | unfavourable markets (6) - value creation from waste/ by-products (4) - immature markets | need to develop new market (4) - economic benefits due to multiple product output (3) - knowledge of customer's needs (3) - business diversifica…	18 7 1 6 6 4 4 3 3	- price competitiveness with fossil feedstock	external	- biorefineries are not economically viable when compared to (e.g. oil refineries); Costs of processing co-products; high cost of soy - Market uncertainties in the processing of biorefinery operations - technical limitations such as low biomass conversion efficiencies during biochemical processes minimize the profitability of industrial operations	barrier, economic barrier, technological barrier, economic & technological	- High costs of the circular system due to new production activities and existing subsidies for conventional materials - Profitability - business diversification towards circular models (creation of new business niches)	sector structure variable sector outcomes sector structure variable			- cost of raw materials for waste biorefinery is negligible, thus the main factors of deciding econo-mic sustainability of waste biore-fineries are the cost of factory construction and operation, waste and products transpor-tation as well as products value; - the economic feasibility of apple orchard waste biorefinery also depends on the extraction methods used and the maximum recovery rate of bi…	economic feasibility			- high demand for solid biomass fuels, bioenergy, and other innovations (for e.g., construction) - low price of international timber	opportunities: characterization of italian wood sector and ist transition towards a circular bioeconomy threat:	- produces simultaneously bio-based chemicals and energy; - "Reduce Reuse Recycle" reduces costs; creates a value chain based on organic waste that makes it possible to earn money by selling organic waste - may open spaces for innovation and create new business niches, particularly as many business model archetypes remain under-explored	strength: of CE in the context of organic waste opportunity: of CE in the context of organic waste	- finding/unveiling market demand for bio-basef products (sometimes need to create new market segments) - lack of demand - pull effect - developing new markets - motivating production of low-priced products (cascading: a product of lower value can seem more attractive and avoid production of product of higher value but also higher costs) - economic competetiveness among recovery alternatives migh…	challenges barrier opportunities	- unfavorable market environ-ment (unawareness about the products limits, its market scope)	barriers, market and investment conditions	- immature market	barriers, institutional barriers, institutional	- unfavorable market environ-ment - issues in market creation	transition barriers, market and investment conditions	- marketing - transition from free-of-charge to payable service - market price dependence - knowlegde of clients' needs - loyality of consumers - participation in trade fairs for promotion	barriers, economic-financial and marketing enablers, economic-financial and marketing	- emphasis on the specific attributes that customers are looking for, dioalogue with customers, especally needs and mindset of future generations - knowledge of markets, organizational cultures, communication and market (communication and marketing skills, understanding buisness environment, its requirements and market dynamics)	transforming factors: macro-environment transformation factors: Intangable and human-related resources and capabilities	- treating the high volumes of existing olive waste and by-products '- diversifying activities of traditional olive oil mills - business opportunity - specializing in agro-waste conversion	business drivers			- food surplus valorization: (im)proper distribution of resources, competition for surplus, co-related problems	aspects of food waste valorization: lethics of food surplus valorization			- lack of cost effective technology for agri-waste to biogas production	barriers -> financial	- price competetiveness for bio-based products & materials - market demand - enable and facilitate market uptake of new agro-waste conversion technologies - create economic value out of agricultural waste	driving forces -> external trends and drivers at business ecosystem level -> economic driving forces -> external trends and drivers at business ecosystem level -> economic driving forces -> internal drivers for innovation at business level	- conventional production has achieved economies of scale with highly competitive pricing - cost of biomass-based production using biomass and waste is still significantly high resulting in high cost of end-products - process improvement and automations have reached high level of maturity in conventional production - biofuels although green in nature are threatened by renewable energy such as sol…	threat	- competition with cheap and low-quality solid biofuels - low prices of fossil fuels - narrow profit margin from the utilization of biomass resulting in uncertainties about costs due to low quantities of biomass each farmer can collect - the fluctuations in fossil fuels’ prices are of interest to alternatives fuels, like biomass - small size market - Farmers are interested in new sources of incom…	barrier, market barriers, economic and finance strengths & driving forces, market's interest on biofuel barrier, market strengths & driving forces, market's interest on biofuel
	investment (15) - need for financial investment (9) - public incentives and subsidies (8) - private investor's interest (5) - lack of financial resources (2)	15 9 8 5 2			- High financial investment for the establishment of biogas generation facilities - Absence of adequate incentive plans for the development of non-conventional renewable energies	barrier, economic & technological barrier, environmental	- policies to provide economic and financial support (e.g. production incentives, infrastructural subsidies and tax benefits)	driver, political			- land investment for biorefinery factory would be in rural areas significantly lower than in urban areas	economic feasibility							- need of investments to integrate biorefineries - lack of financial resources/capital (both: private investors wanting to invest in such businesses and incentives from governments) - lack of incentives for upcycling - willingness to invest in new business models - (partial) lack of government support (political & financial incentives or subsidies -> regional and national differences)	challenges barriers drivers barriers	- unfavorable investment condit-ions (limited scope of CBE products -> stakeholders are hesitant to invest)	barriers, market and investment conditions	- inadequate funds, lack of coordination amongst agencies - high instalation cost	barriers, institutional	- unfavorable investment condit-ions	transition barriers, market and investment conditions	- financial support - financing capacity - financing, need to know which are support options - investment costs - public financing	enablers, economic-financial and marketing barriers, economic-financial and marketing enablers, economic-financial and marketing	- support of companies in the early phases - risk financing and finding investors - impatient shareholders (expect innovations to be commercialized in a shorter timeframe)	transforming factors: macro-environment transforming factors: tangible organizational resources and capabilities					- infrastructure cost	aspects of food waste valorization: coping with uncertainties	- regional funding (European regional development fund)	driving forces & relations within BE -> measures of government	- lack of efficient subsidies and compensations for agri-wastes to biogas based systems - high capital costs of the technologies	barriers -> financial	- investments in technology - investments in agro-logistic network	driving forces -> external trends and drivers at business ecosystem level -> economic	- higher investment due to new processes and technology development requirement	weakness	- lack of interest on investing in the biomass industry - difficulties in bank lending - no specific subsidies for the purchase or use of agricultural biomass - Growing interest of investors in bio energy, as the market wind and photovoltaic becomes saturated - the cost of purchasing collection machinery individually cannot be depreciated	barrier, market strengths & driving forces, market's interest on biofuel
	operational costs (9) - costs of biomass (6) - logistic costs (4)	9 6 4			- High complexity and costs of selection and supply of raw materials, and transport	barrier, economic & technological					- diversity of low-cost wastes from apple orchards provides great opportunities for biorefinery - cost of raw materials for waste biorefinery is negligible, thus the main factors of deciding economic sustainability of waste biorefineries are the cost of factory construction and operation, waste and products transportation as well as products value;	economic feasibility	- storage and transportation cost	economic selection criteria for biomass resource selection			- logistic cost and complexity of supply chain management	weakness: of CE in the context of organic waste opportunity: of CE in the context of organic waste	- transportation/logistics costs and management - exploring the local economy (exportation might not be attractive greatly due to logistics costs and environmental impacts) - lower production costs when using bioresources/biowaste (using bioresources/waste can (but not necessarly and always will) lead to lower costs.	barrier opportunities									- wood-based raw material: availability, sustainability, origin and communication about it, competetive pricing and efficiency	transforming factors: tangible organizational resources and capabilities			- feedstock planned for may turn out to be too costly to process into lower value proucts only	drivers of CBE in EU	- operational cost	aspects of food waste valorization: coping with uncertainties							cost of biomass-based production using biomass and waste is still significantly high resulting in high cost of end-products	threat
	general socio-economic development (3) - population development (2) - economic crises (1)	3 2 1					- effects of national economic crisis on sustainable alternatives	sector structure variable																													demographics -> strong world population growth (increase in demand for products)	driving forces & relations within BE -> demand drivers							- uncertainty in the investment climate due to the economic crisis	barrier, economic and finance
	POLITICAL		POLITICAL								POLITICAL								POLITICAL								POLITICAL								POLITICAL								POLITICAL
	policies, legislation & standards (18) - supporting policies and legislation (10) - unfavorable | inadequate policies and legislation (9) - missing policies and legislation (5) - inconsistent policies and legislation (1) - normative tools such as technical standards and certifications (1) - availability and direction of regional policies and legislation (1)	18 10 9 5 1 1 1	- supporting policies and legislation	internal	- political barriers to achieving sustainable bioeconomies	social barriers	- normative tools such as technical standards and certifications	political driver	- BE strategies and initiatives accross different levels: BE needs to be framed as a political project not only as a techno-scientific or economic one	conditions & driving forces for transition to a BE					- increasing number of EU policies and growing scientific and technological interest in forest management - inconsistent framing conditions (e.g. incoherent policy fraework, msalignment of financial tools, poor governance) - high compliance with environmental certification	opportunity: characterization of italian wood sector and its transition towards a circular bioeconomy weakness: trenght:	- lack of public policy that is concerned with environmental issues; low support from local government	threat: of CE in the context of organic waste	- lack of regulations and policies to promote environ-mentally sound product design - overregulation or inadequate regulation (e.g. policies to reduce waste tend to increase costs of this raw material; many policies focus on bioenergy and biofuels) - waste management regulation	challenges barriers driver	- missing global policies - lack of government support - unfavorable policies and politics	barriers, policies and regulations barriers, market and investment conditions barriers, policies and regulations			- missing policies - unfavorable policies and politics	transition barriers, policies and regulations transition barriers, policies and regulations	- public support and training - public laws for energy transition and waste seperation - laws pushing professionals to change - public regulation - fiscal constraints - reglementary and administrative barriers	enablers, technical and logistic enablers, institutional and legal barriers, institutional and legal	- EU- and national level policies and regulations as prerequsite and transition driver for new businesses - avoid unnecessary restrictions and regulations	transforming factors: macro-environment transforming factors: macro-environment			- improved framework conditions (new EU strategies and directives)	drivers of CBE in EU	- governance of food waste	aspects of food waste valorization: coping with uncertainties	- global, EU and national policies (…on agriculture, fisheris, and forestry; on renewable energy and energy from fossil fuels; focus on bioenergy in policy landscape can hinder cascading, BE strategies, policies related to CE, policies not directly targeted at BE - legislation - regional policies (regional innovation strategies for smart specialisation)	driving forces & relations within BE -> measures of government	- no comprehensive and appropriate policies	barriers -> institutional and regulatory	- national bio-or circular economy strategies & policies - agro-waste management regulations	driving forces -> external trends and drivers at business ecosystem level -> political driving forces -> external trends and drivers at business ecosystem level -> legal	- environmental and public policies are supporting the growth and investment into the bioeconomy sector	opportunity	- the national energy planning is incomplete regarding residual biomass data - obligatory burning of crop residues on the field, turning gields poor in nutrients - high VAT (value added tax) for solid biofuels in Greece (24%), higher than that of the European Average - lack/ignorance of legislation for bioenergy entrepreneurship - More rigorous policies on the open combustion of waste and possibl…	barrier, legislative barrier, market barrier, knowledge and skills strengths & driving forces, existing national policies and regional strategies
	policy implementation (8) - ineffectual execution (4) - uncertainties in future legislation (predictable, less turbulent) (3) - excessive bureaucracy (2)	8 4 3 2					- excessive bureaucracy (e.g. due to weak legislative coordination at differen institutional levels)	sector structure variable							- excessive bureaucratization - lack of long-term planning by local governments and lack of policy coordination in support of forest management	threat: weakness: characterization of italian wood sector and ist transition towards a circular bioeconomy					- policy implementation problems	barriers, policies and regulations	- ineffectual execution	barriers, institutional	- policy implementation problems	transition barriers, policies and regulations			- predictable and less turbulent legislation	transforming factors: macro-environment					- bridging legal gaps	aspects of food waste valorization: coping with uncertainties			- lack of policy enforcement and compliance - coordination and cooperation of the policy enacting authority	barriers -> institutional and regulatory barriers -> institutional and regulatory
	SOCIAL		SOCIAL								SOCIAL								SOCIAL								SOCIAL								SOCIAL								SOCIAL
	cooperation (16) - stakeholder involvement (7) - clusters & networks (7)	16 7 7					- intensification of stakeholder relationships to reflect different values and preferences	sector structure variable	- bioclusters promoting collaboration and knowledge transfer in BE	conditions & driving forces for transition to a BE					- existence of intra-sectoral networks in processing phases	strenght: characterization of italian wood sector and ist transition towards a circular bioeconomy	- creates synergies in cooperative projects; offers the possibility to promote green solutions through business parnterships abroad; - stakeholder networks	strength/ opportunity/weakness: of CE in the context of organic waste	- collaboration (cross-sector, private-private, public-private -> reaching new marktes, joint investment, economies of scale, knowledge exchange) - establishment of collaborations and networks	challenges drivers	- difficulty in forming a reliable supplier network (beeing unaware of CBE, very limited parties are involved in the supplier network) - problem in communication and coordination (lack of knowledge and limited involvement of suppliers creates difficulty) - problem in value co-creation (unawareness of CBE results in problems establishing a relationship with stakeholders)	barriers, knowledge and network formation			- difficulties with network formation - coordination and communication problems - different views and expectations within networks	transition barriers, knowledge and network formation	- proximity & long-term partnership - proximity, confidence, openness & engagement of actors - collective management of waste - complementary skills territorial embeddedness - public-private partnerships collaboration, networks, partners - knowledge of retailers - land-use control - direct local production by producers without an intermediary	enablers, organizational and spatial	- acceptance of local stakeholders, active networking and dialogue with stakeholders - create collaborations and partnerships in order to advance new intellectual capacities and innovations. Transdisciplinary business ecosystems	transforming factors: industry and market environment			- farmers, foresters and mariners becoming an integrated part of new bio-based value chains (f, f & m are essential stakeholders, BE will not be socially sustainable without buy in and benefit to them)	drivers of CBE in EU	- cooperation among actors	aspects of food waste valorization: local embeddedness	- advances in horizontal and vertical integration - globalization (harmonization of standards and labeling due to global trade of products and innovations)	driving forces & relations within BE -> supply drivers -> market organization	- stakeholder involvement (farmers, aggregators, equipment manufacturers & suppliers, entreprenneurs, agri-extension agencies and organizations)	opportunities -> stakeholder involvement	- collective response to agro-waste management regulations - create multiple benefits via a cluster - interest in jointly developing a circular economy appraoch - enable cross-sector cooperation for by-product valorization - cluster public and private actors for circular economy	driving forces -> internal drivers for innovation at business level	- enables industries such as agriculture, chemicals, and energy to collaborate and create opportunities of sustainable growth - lower existing synergies between feedstock supply and demand - clustering of industries such as food processing, chemicals and energy production can create immense synergies reducing the overall costs of production - lack of insfrastructure support to enable seamless col…	strength weakness opportunity	- difficulties in partnership building - there are several agro-industries linked to the agricultural sector (olive-growing, olive-residue and canning) that can be "consumers" ar "logistic centers" for biomass, in the region - development of cooperative infrastructures (including rural energy cooperatives) which can explore more thoroughly the management and the energy use of biomass in a busines…	barrier, knowledge and skills strengths & driving forces, strong agro-industrial and food sector strengths & driving forces, market's interes on biofuels
	jobs & labour (15) - availability of skilled labour (10) - job creation (in rural areas) (6) - labour conditions (1)	15 10 6 1	- availability of qualified human resources	external	- exploitation of child labor or oppressive labor regimes	social barriers	- business diversification towards circular models (creation of new jobs)	sector structure variable	- intellectial capital for BE development (human capital /skilled workforce)				- personel - employment	economic selection criteria for biomass resource selection social selection criteria for biomass resource selection	- few highly skilled professionals	weakness: characterization of italian wood sector and ist transition towards a circular bioeconomy	- the development of biorefineries creates new jobs and investment - lack of experts to implement local projects	opportunity: of CE in the context of organic waste threat: of CE in the context of organic waste			- missing skills and competence (unawareness of CBE results in semi-skilled workers)	barriers, technology and material	- unavailability of skilled technicians	barriers, social			- recruitment in rural area	barriers, organizational and spatial	- high quality education and scientific knowledge, study programs should meet practical needs of companies	transforming factors: industry and market environment			- biorefineries stimulating rural development (creating new jobs, economic & social development in rural areas)	drivers of CBE in EU			- availablity of skilled labor	driving forces relations within BE -> resource availability					- enables local and rural employment increasing self-sufficiency and additional revenue source for individuals and industries	strength	- mismatch between the skills of the labor force and the evolving need of the industry - absence of vocational training need to identify and adress skills gaps - lack of aligning of Smart Specialization Strategies of the region with skills	barrier, knowledge and skills
	consumer awareness (product) (14) - green consumerism (bio-based and waste valorization) (9) - awareness of CBE products (6) - consumer's perception of product quality (e.g. non-primary cycle) (4) - regionality of products (2) - consumer reluctance to change (1)	14 9 6 4 2 1					- green consumerism: increased public awareness of sustainable solutions	sector structure variable					- sustainable energy	social selection criteria for biomass resource selection	- increasing emphasis on achieving SDGs	opportunity: characterization of italian wood sector and ist transition towards a circular bioeconomy	- lack of publick awareness regardning bio-based products	threat: of CE in the context of organic waste	- lack of public /consumer awareness (necessary to attract attention to BE products) - consumer willingness to buy products on non-primary cycles - competitive advantages (products with lower environmental impacts) - Quality/efficiency of final product (might be perceived as lower compared to fossil/non-revewable products)	challenges challenges driver challenges	- difficulty in developing customers (familiarizing the customers to CBE product)	barriers, market and investment conditions	- lack of waste to value concept - reluctance to change - lack of belongingness - lack of environmental concerns	barriers, social	- lack of public awareness, interest, and engagement	transition barriers, social acceptance	- increasing awareness of the environmental problems - a curiosity of the public towards new products - the trend for waste valorization and agro-ecology - not everybody is sensible for the waste topic - "made in France"	enablers, environmental, social and cultural enablers, economic-financial and marketing	- globally accepted and recognized goals (mitigating global warming; other global challenges, such as replacing plastics or other fossil-based products through sustainable materials & products)	transforming factors: macro-environment	- quality, combined with origin and environment	business drivers			- consumer perception - customer goodwill - retail reputation	aspects of food waste valorization: societal perception	- consumer prefences (shifting consumer demand based on awareness of the need to ensure sustainable production and consumption is expexted to be a major factor driving future markets in the EU, e.g. awareness on environemtnal issues like climate change and plastic pollution)	driving forces relations within BE -> demand drivers			- consumer awareness of bio-based products	driving forces -> external trends and drivers at business ecosystem level -> social
	social acceptance (production) (12) - public acceptance (7) - competition for biomass with food production (5) - interfering civil society | promotion to increase acceptance (5) - impacts on human health (1)	12 7 5 5 1	- social benefits - public acceptance	internal external	- social, psychological barriers to achieving sustainable bioeconomies - competitiveness between bio-based products and food production might compromise the availability and cost of food - competitiveness of soy oil among the food and biofuel industries	social barriers barrier, economic	- lack of social acceptance: public opposition to plants (i.e. NIMBY attitudes, esp. due to odor) - reduced impacts on human health	sector structure variable sector outcomes					- acceptability - food security	social selection criteria for biomass resource selection	- increasing lobbying by NGOs, as well as traditional and new stakeholder groups within the transformation phase	opportunity: characterization of italian wood sector and ist transition towards a circular bioeconomy									- public opposition	transition barriers, social acceptance	- media communication - support of local communities - acceptability - competition for food surplus resources	enablers, environmen-tal, social and cultural barriers, environmen-tal, social and cultural barriers, technical and logistic							- community involvement - ensure food safety (monitoring requirements, actions taken to improve food safety, role of private standards)	aspects of food waste valorization: local embeddedness aspects of food waste valorization: oblilgation to ensure food safety	- competition of biomass for food and non-food use	driving forces & relations within BE -> resource availablity	- demonstrations activities and promotional programmes - outreach and education	opportunities -> information and awareness	- implication of the civil society	driving forces -> external trends and drivers at business ecosystem level -> social			- strong belief that bioenergy plants pollute - NIMBY (Not In My Backyard) Syndrome	barrier, cultural
	company culture | regional culture (11) - commitment to sustainability, esp. environ. protection (4) - vision-driven culture | willingness to change (4) - willingness to cooperate (2) - closed-loop thinking (2) - innovative, agile, imaginative and creative (1) - non-hierarchical (1)	11 4 4 2 2 1 1			- Dependence on external conditions, such as territorial characteristics and history of development, local culture, and the relationship with nature	social barriers	- hesitant company culture: limited willingness of incumbent producers to collaborate in the value chain	sector structure variable							- limited entrepeneurship among forest managers - widley diffused wood craft culture	weakness: characterization of italian wood sector and ist transition towards a circular bioeconomy strenght: characterization of italian wood sector and ist transition towards a circular bioeconomy			- cultural unfitness: company culture does not allow or makes a transition to CBE difficult - open, environment-driven culture (company's culture, support from top management) - company size (large companies: lack dynamic capability, knowledge of end user; small companies: to small to uptake complications and costs of new paths)	barriers driver challenges	- lack of vision (absence of foresightedness limits the adoption of CBE) - lock-ins in buisness models (industries used to linear system than CBE model) - restrictiveness to change (most industries are reluctant to transition) - problems related to standards (absence of universal product standards questions the reliability of CBE)	barriers, organizational sstructure			- low willingness and restrictiveness to change - lock-ins in infrastructures and business models - challenges related to standards	transition barriers, sectoral routines and structures	- quality requirements	barriers, technical and logistics	- innovative, agile and encouraging organizational culture (willingness, belief and reactivity in change; courage to take risks; encouraging employees toward continuous innovativeness, imagination and creativity; facilitate continuous knowledge develpment) - flexible employees and multidisciplinary teams - non-hierarchical top management and "power people" as a source of innovative atmosphere	transformation factors: Intangable and human-related resources and capabilities	- commitment to sustainable development, particularly to environmental protection - circular economy principles and closed-loop thinking	business drivers									- define a common sustainable development strategy	driving forces -> internal drivers for innovation at business level			- mistrust - farmers prefer easy solutions, not complicated ones - farmers consider only the cost of biomass managament rather the savings that can be achieved by their energy utilization due to the lack of information -strong belief that biomass installations are difficult to operate - the sharing of the residue collection machinery is culturally dificult - significant difficulties in signing bi…	barrier, cultural barrier, organizational barrier, knowledge and skills strengths & driving forces, strong agro-industrial and food sector strengths & driving forces, local knowledge
	METHODOLOGICAL		METHODOLOGICAL								METHODOLOGICAL								METHODOLOGICAL								METHODOLOGICAL								METHODOLOGICAL								METHODOLOGICAL
	uncertainties in environmental & economic assessment (3) - availability of (standardized) methodologies (3) - availability of data for econ./ environ. evaluation (2) - availability of results (1)	3			- Difficulty in defining a standard methodology to measure the economic contribution of CBE - Absence of data on the sustainability assessment makes it difficult to compare and reproduce the results; Difficulty in measuring environmental impacts in production of bioproducts; Insufficient knowledge about the energy potential of biomass sources	barrier, economic & technological barrier, technological																																	cost benefit analysis	opportunities -> information and awareness					- lack of knowledge about the impact of the fuel quality has on the environment (e.g., ash, nitrogen, chlorine, etc.) and available technological innovations - lack of knowledge on the availabile technological scenarios for a CWBE - insufficient knowledge on biomass productivity from agricultural crops - inconsistency in the statistical data produced by the relevant regional and national organiza…	barrier, knowledge and skills barrier, technical barrier, data collection

## Sheet: Literature
Reference	year	nr	author	title	DOI	Kontext
Khan (2022)	2022	1	Khan, F & Ali, Y	Moving towards a sustainable circular bio-economy in the agriculture sector of a developing country	https://doi.org/10.1016/j.ecolecon.2022.107402	determination of a sustainable agricultural waste management technic using SWOT & TOPSIS in a developing country
Salvador (2022)	2022	2	Salvador, r.; Pereira, R. B.; Sales, G. F.; de Olivieira, V. C. V.; Halog, A.; Francisco, A.C.	Current Panorama, Practice Gaps, and Recommendations to Accelerate the Transition to a Circular Bioeconomy in Latin America and the Caribbean	https://doi.org/10.1007/s43615-021-00131-z	review: drivers and opportunities for CBE in Latin America & Caribbean
Marone (2021)	2021	3	Marone, P; Yilan, G.; Imbert, E.	Using fuzzy cognitive maps to identify better policy strategies to valorize organic waste flows: An Italian case study	https://doi.org/10.1016/j.jclepro.2021.128722	understanding barriers to effective adoption of CBE technologies (use of biodegradable MSW as feedstock) and identification of effective policy strategies
Ding (2021)	2021	4	Ding, Z.; Grundmann P.	Development of Biorefineries in the Bioeconomy: A Fuzzy-Set Qualitative Comparative Analysis among European Countries	https://doi.org/10.3390/su14010090	identification and analysis of configurational conditions for the establishment of biorefineries in 20 European countries
Qin (2021)	2021	5	Qin, S.; Giri, B.S.; Patel, A.K.; Sar, T.; Liu, H.; Chen, H., Juneja, A.; Kumar, D.; Zhang, Z.; Awasthi, M.K.; Taherzadeh, M.J.	Resource recovery and biorefinery potential of apple orchard waste in the circular bioeconomy	https://doi.org/10.1016/j.biortech.2020.124496	review: environmental & economic feasibility analysis and prospects & challenges of apple orchard waste biorefinery
Ossei-Bremag (2021)	2021	6	Ossei-Bremang, R.N.; Kemausuor, F.	A dcision support system for the selction of sustainable biomass resources for bioenergy production	https://doi.org/10.1007/s10669-021-09810-6	multicriteria decision making by FTOPSIS for the selection of sustainable biomass resources for bioenergy in Ghana
Falcone (2020)	2020	7	Falcone, P.M.; Tani, A.; Tartiu, V.E.; Imbriani, C.	Towards a sustainablel forest-based bioeconomy in Italy: Findings from a SWOT analysis	https://doi.org/10.1016/j.forpol.2019.04.014	SWOT multi-level perspective framework: understanding potential drivers and barriers of the transition of the Italian forest sector towards a CBE and derivation of effective transition strategies
Paes (2019)	2019	8	paes, L.A.B.; Bezerra, B.S.; Deus, R.M.; Jugend, D.; Battistelle, R.A.G.	Organic solid waste management in a circular economy perspective - A systematic review and SWOT analysis	https://doi.org/10.1016/j.jclepro.2019.118086	review: identification of the state of the art and the SWOT of organic waste management through CE principles
Salvador (2022a)	2022	9	Salvador, R,; Barros, M.V.; Donner, M; Brito, P., Halog, A.; De Francisco, A.C.	How to advance regional circular bioeconomy systems? Identifying barriers, challenges, drivers, and opportunities	https://doi.org/10.1016/j.spc.2022.04.025	review: identification of drivers, opportunities, challenges & barriers for businesses in CBE; regional differences in different continents (Africa, America, Australia, Europe)
Karuppiah (2022)	2022	10	Karuppiah, K.; Sankaranarayanan, B.; Ali, S.M.	Towards Sustainability: Mapping Interrelationships among Barriers to Circular Bio-Economy in the Indian Leather Industry	https://doi.org/10.3390/su15064813	identification and evaluation of 25 barriers to CBE practices in the Indian leather industry and their interrelationships
Paes (2022)	2022		Paes, L.A.B.; Bezerra, B.S.; Jugend, D.; Agudo, F.L.	Prospects for a circular bioeconomy in urban ecosystems: Proposal for a theoretical framework	https://doi.org/10.1016/j.jclepro.2022.134939	how can CBE principles support the services provided y urban ecosystems, considering their socio-ecological needs
Yadac (2022)	2022	11	Yadav, P.; Yadav, S.; Singh D.; Giri, B.S.; Mishra, P.K.	Barriers in biogas production from the organic fraction of municipal solid waste: A circular bioeconomy perspective	https://doi.org/10.1016/j.biortech.2022.127671	identification and categorization of 20 barriers for biogas-based CBE (biogas production from organic MSW) in developing countries
Gottinger (2020)	2020	12	Gottinger, A.; ladu, L.; Quitzow, R.	Studying the Transition towards a Circular Bioeconomy - A Systematic Literature Review on Transition Studies and Existing Barriers	https://doi.org/10.3390/su12218990	review: identification and classification of transition drivers and barriers towards a sustainable CBE, global
Bottausci (2021)	2021		Bottausci, S.; Midence, R.; Serrano-Bernardo, F.; Bonoli, A.	Organic Waste Management and Circular Bioeconomy: A Literature Review Comparison between Latin America and the European Union	https://doi.org/10.3390/su14031661	comparison between EU and Latin America regarding organic waste valorization; Analysis of state fo the art CBE in Latin America, detect differences and similarities in technologies
Donner (2020)	2020	13	Donner,M.; de Vries, H.	How to innovate business models for a circular bio-economy?	https://doi.org/10.1002/bse.2725	Investigation of 8 European business model innovations for a sustainable CBE within the agrifood sector through valorization of agricultural waste and by-products. Investigation of innovation drivers and elements.
Näyhä (2020)	2020	14	Näyhä, A.	Finnish forest-based companies in transition to the circular bioeconomy - drivers, organizational resources and innovations	https://doi.org/10.1016/j.forpol.2019.05.022	identification of drivers and resources that forest-based companies highlight as significant in the transition to the sustainable and competitive CBE in Finland.
Donner (2023)	2023	15	Donner,M.; de Vries, H.	Innovative Business Models for a Sustainable Circular Bioeconomy in the French Agrifood Domain	https://doi.org/10.3390/su15065499	investigation of 44 local, collaborative, and small-scale innovative CBE business models in the French agrifood domain concerning main drivers, business model elements, circular economy principles, enablers and barriers, and sustainability benefits.
Lange (2021)	2021	16	Lange, L.; Connor, K.O.; Arason, S.; Bundgård-Jørgensen, U.; Canalis, A.; Carrez, D.; Gallagher, J.; Gøtke, N.; Huyghe, C.; Jarry, B.;, Llorente, P.; Marinova, M.; Martins, L.O.; Mengal, P.; Paiano, P.; Panoutsou, C.; Rodrigues, L.; Stengel, D.B.;, van der Meer, Y.; Vieira, H.	Developing a Sustainable and Circular Bio-Based Economy in EU: By Partnering Across Sectors, Upscaling and Using New Knowledge Faste, and For the Benefit of Climat, Environment & Biodiversity, and People & Business	https://doi.org/10.3389/fbioe.2020.619066	review: overview of the development of the EU CBE through the description of product portfolio and pillars of CBE as well as the analysis of drivers of CBE.
Mikielewicz (2020)	2020		Mikielewicz, D.; Dabrowski, P.; Bochniak, R.; Golabek, A.	Current Status, Barriers and Development Perspectives for Circular Bioeconomy in Polish South Baltic Area	https://doi.org/10.3390/su12219155	Current status: legal situation, biomass production, biomass management in Poland and EU, during the analysis the most important barrier to implementation of CE was distingished
Rao (2023)	2023	17	Rao, M.; Bast, A.; de Boer, A.	Understanding the phenomenon of food waste valorisation for the perspective of supply chain actors engaged in it	https://doi.org/10.1186/s40100-023-00279-2	Identification of the current state of the food supply chain and of barriers and enablers in terms of a transition towards CBE through the valorization of surplus food and food processing by-products in the Netherlands
Kardung (2021)	2021	18	Kardung, M.; Cingiz, K.; Costenoble, O.; Delahaye, R.; Heijman, W.; Lovcric, W; van Leeuwen, M.; M'Barek, R.; van Meijl, H.; Piotrowski, S.; Ronzon, T.; Sauer, J.; Verhoog, D.; Verkerk, P.J.; Vrachioli, M.; Wesseler, J.H.H.; Zhu, B.X.	Development of the Circular Bioeconomy: Drivers and Indicators	https://doi.org/10.3390/su13010413	Proposal of a conceptual analysis framework to quantify and analyze the development of the EU BE: identification of driving factors and outline of a set of monitoring indicators linked to objectives of EU BE strategy.
Kapoor (2020)	2020	19	Kapoor, R.; Ghosh, P.; Kumar, M.; Sengupta, S.; Gupta, A.; Kumar, S.S.; Vijay, V.; Kumar, V.; Kumar Vijay, V.; Pant, D.	Valorization of agricultural waste for biogas based circular economy in India: A research outlook	https://doi.org/10.1016/j.biortech.2020.123036	review: discussion of the potentials of biogas production from agricultural waste along with the government initiatives and policy regulations as well as barriers that impede the development towards agri-waste to biogas-based CBE in India.
Donner (2021)	2021	20	Donner, M.; Radic, I.	Innovative Circular Business Models in the Olive Oil Sector for Sustainable Mediterranean Agrifood Systems.	https://doi.org/10.3390/su13052588	review of Mediterranean entrepreneurial initiatives creating value from olive waste and by-products via CBE approaches: business drivers, value creation mechanisms, and conversion pathways.
Negash (2023)	2023		Negash, Y.T.; Calahorrano Sarmiento, L.S.; Tseng, S.-W.; Lim, M.K.; Tseng, M.-L.	A circular waste bioeconomy development model in the Ecuadorian fishery industry: the impact of government strategy on supply chain integration and smart operations	https://doi.org/10.1007/s11356-023-29333-8	development of measures to address the interrelationships among circular waste-based BE (CWBE), fuzzy decision-making, determine driving criteria of CWBE
Usmani (2021)	2021	21	Usmani, Z.; Sharma, M.; Awasthi A.K.; Lukk, T.; Tuohy M.G.; Gong, L.; Nguyen-Tri P.; Goddard, .A.D.; Bill, R.M.; Nayak, S.C.; Gupta, V.K.	Lignocellulosic biorefineries: The current state of challenges and strategies for efficient commercialization	https://doi.org/10.1016/j.rser.2021.111258	review: examination of the global drivers towards the advancements of lignocellulosic biorefineries, technical and operational challenges for industrialization and future directions towards overcoming them.
Alibardi (2020)	2020	22	Alibardi, L.; Astrup, T.F.; Asunis, F.; Clarke, W.P.; De Gioannis, G.; Dessì, P.; Lens, P.N.L.; Lavagnolo, M.C.; Lombardi, L.; Muntoni, A.; Pivato, A.; Polettini, A.; Pomi, R.; Rossi, A.; Spagni, A.; Spiga, D.	Organic waste biorefineries: Looking towards implementation	https://doi.org/10.1016/j.wasman.2020.07.010	overview of the framewirk and context to makre organic waste biorefineries viable, discuss critical aspects associated with future implementaion, develop recommendations fur suitable configurations
Kokkinos (2018)	2018	23	Kokkinos, K.; Lakioti, E.; Papageorgiou, E.; Moustakas, K.; Karayannis, V.	Fuzzy Cognitive Map-Based Modeling of Social Acceptance to Overcome Uncertainties in Establishing Waste Biorefinery Facilities	https://doi.org/10.3389/fenrg.2018.00112	Social acceptance of sustainable waste biorefinery facilities, Fuzzy Cognitive Map modeling, factors that infuelnce the development of organic or chemical treatment of waste by the local communities and competent authorities
Fytili (2022)	2022	24	Fytili, D.; Zabaniotou, A.	Organizational, societal, knowledge and skills capacity for a low carbon energy transition in a Circular Waste Bioeconomy (CWBE): Observational evidence of the Thessaly region in Greece	http://dx.doi.org/10.1016/j.scitotenv.2021.151870	Exploration of the main barriers, challenges, opportunities, and the context in which agro-biomass and agro-industrial waste valorization can accelerate a low carbon economy in the Thessaly region in Greece.
